# Supplementary material for: A novel strategy for realizing high nitrogen doping in Fe3C-embedded nitrogen and phosphorus-co-doped porous carbon nanowires: efficient oxygen reduction reaction catalysis in acidic electrolytes
Source: Royal Society of Chemistry journal article supplement (doi:10.1039/c9ta04388h), 2019-01-01
Supplement: c9ta04388h1.pdf [file c9ta04388h1.pdf]

## Electronic Supplementary Information

**A novel strategy for realizing the high nitrogen doping in Fe<sub>3</sub>C embedded nitrogen and phosphorus co-doped porous carbon nanowires: Efficient oxygen reduction reaction catalysis in acid electrolyte**

Mian Li,<sup>a,\*</sup> Yang Liu,<sup>b</sup> Lina Han,<sup>b</sup> Jie Xiao,<sup>a</sup> Xiaoyuan Zeng,<sup>a</sup> Chengxu Zhang,<sup>a</sup> Mingli Xu,<sup>a</sup> Peng Dong,<sup>a</sup> and Yingjie Zhang<sup>\*,a</sup>

*<sup>a</sup> National and Local Joint Engineering Laboratory for Lithium-ion Batteries and Materials Preparation Technology, Key Laboratory of Advanced Battery Materials of Yunnan Province, Faculty of Metallurgical and Energy Engineering, Kunming University of Science and Technology, Kunming 650093, China.*

*<sup>b</sup> Faculty of Material Science and Engineering, Kunming University of Science and Technology, Kunming 650093, China.*

*E-mail: [mianzi2009@126.com](mailto:mianzi2009@126.com), [lim148@kmust.edu.cn](mailto:lim148@kmust.edu.cn) (M. Li); [zyjkmust@126.com](mailto:zyjkmust@126.com) (Y. Zhang)*

---

## 1. Experimental Section.

### Physical characterization of precursor networks and resultant control samples.

Wide-angle XRD patterns were obtained on an X-ray D/max-2200 vpc (Rigaku Corporation, Japan) instrument operated at 40 kV and 20 mA using Cu K $\alpha$  radiation ( $k$  0.15406 nm). SEM characterization was performed by using a Philips XL-30 ESEM equipped with an EDX analyzer. TEM analyses were performed on a high-resolution Hitachi JEM-2100 system. Surface analyses of resultant control catalysts were carried out by XPS on an ESCA LAB spectrometer (USA) using a monochromatic Al K $\alpha$  source ( $h\nu$  1486.6 eV). The binding energies were calibrated by using the containment carbon (C1s 284.6 eV). The N<sub>2</sub> adsorption-desorption isotherms were performed on an ASAP 2020 (Micromeritics, USA). Before the measurements, the samples were degassed in vacuum at 150 °C for 6 h. The Brunauer-Emmett-Teller (BET) method was utilized to calculate the BET specific surface area using adsorption data. The pore size distribution was derived from the adsorption branch by using the Barrett-Joyner-Halenda (BJH) model. Raman spectra were obtained using a confocal microprobe Raman system (HR800, JobinYvon).

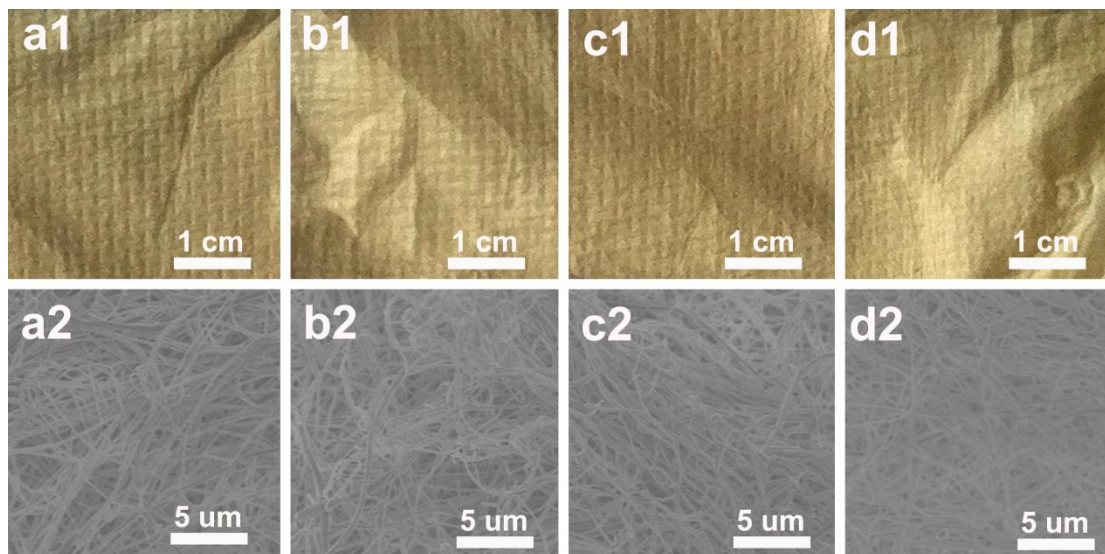

**Fig. S1.** The digital photographs (**a1-d1**) and SEM images (**a2-d2**) of as-woven 3D precursor networks for  $\text{Fe}_3\text{C@PCFs}$  (**a1, a2**),  $\text{Fe}_3\text{C@N-PCFs}$  (**b1, b2**),  $\text{Fe}_3\text{C@P-PCFs}$  (**c1, c2**), and  $\text{Fe}_3\text{C@NP-PCFs}$  (**d1, d2**) samples.

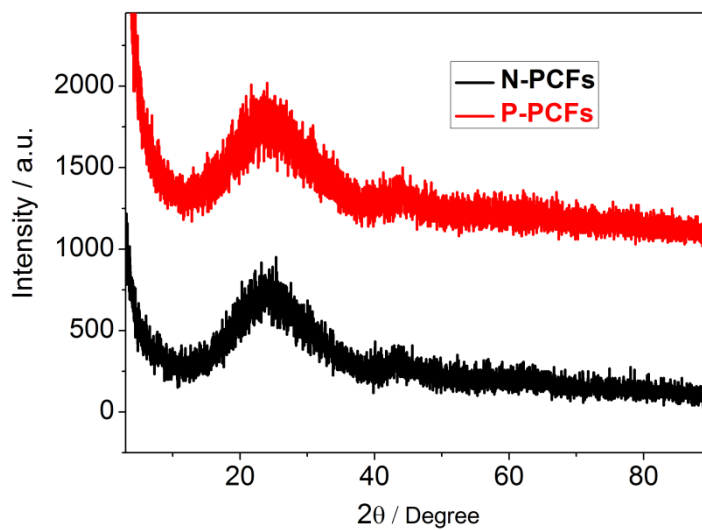

**Fig. S2.** The XRD patterns of resultant N-PCFs and P-PCFs samples.

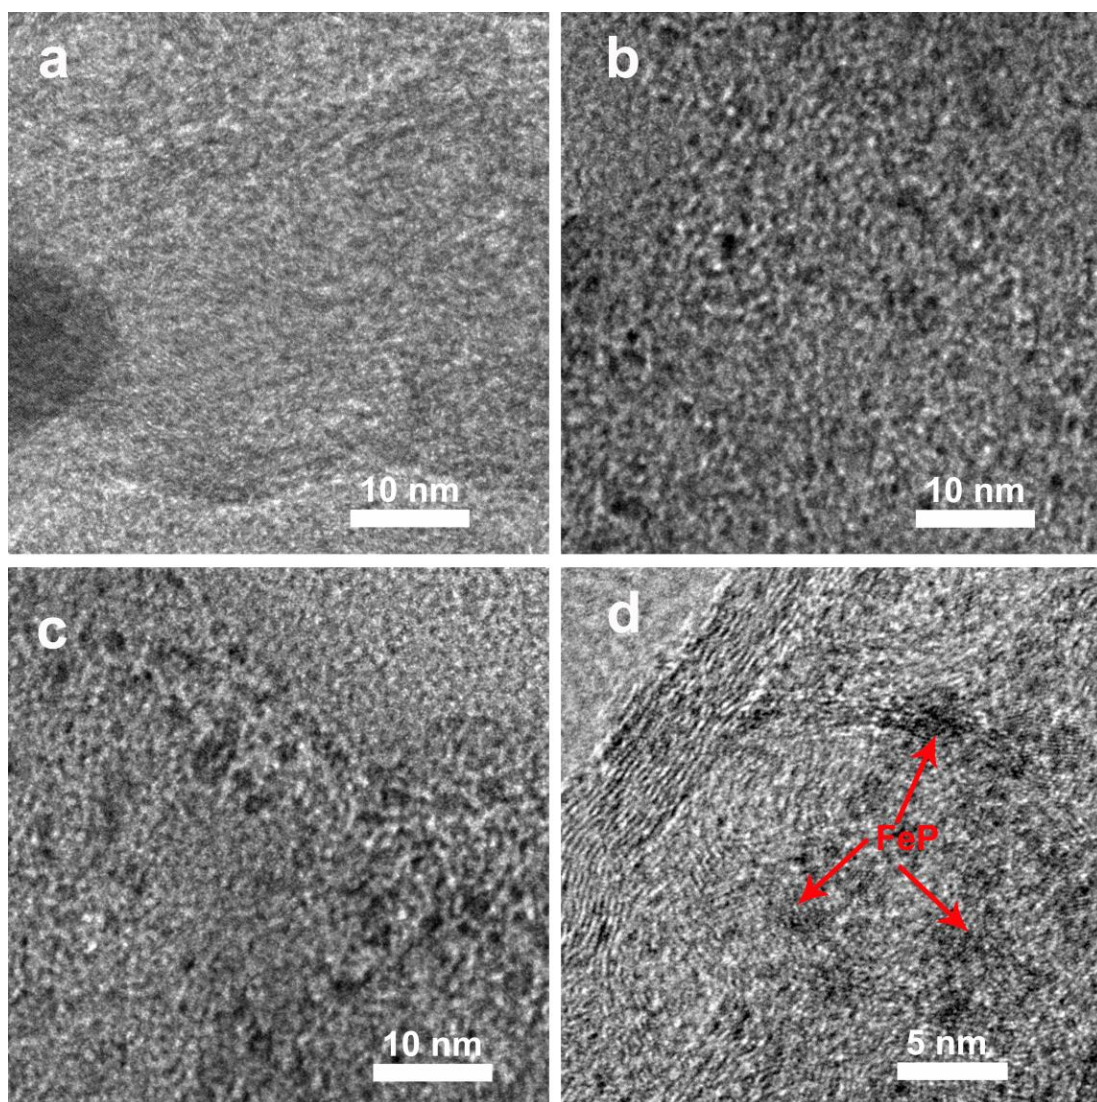

**Fig. S3.** HRTEM image of  $\text{Fe}_3\text{C@N-PCFs}$  (a),  $\text{Fe}_3\text{C@P-PCFs}$  (b) and  $\text{Fe}_3\text{C@PN-PCFs}$  (c, d) samples.

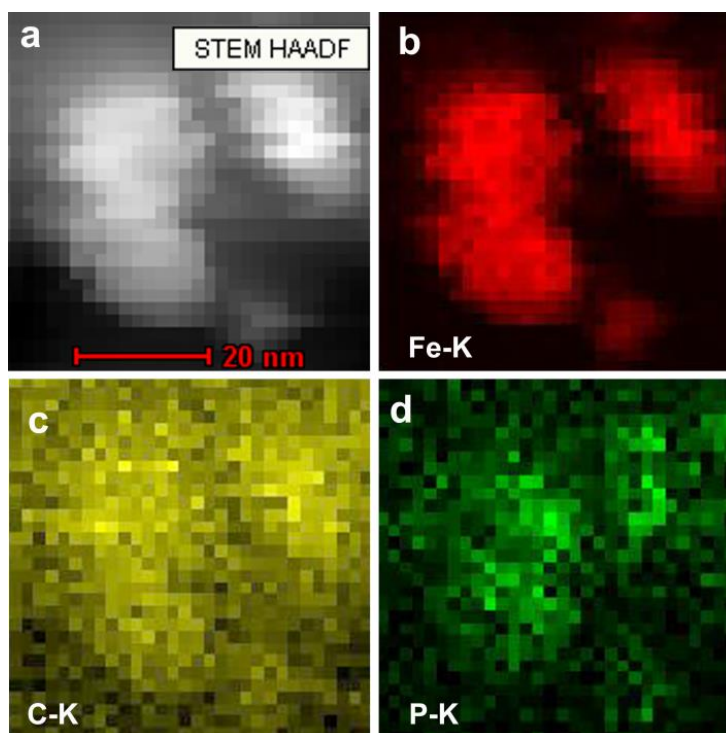

**Fig. S4.** Magnified HAADF-STEM image and corresponding EDS mapping of Fe, C and P elements for  $\text{Fe}_3\text{C}@P\text{-PCFs}$  sample.

The HAADF-STEM image and corresponding EDX elemental mapping images of  $\text{Fe}_3\text{C}@P\text{-PCFs}$  (**Fig. S4**) reveal that P and C elements were homogeneously dispersed along the catalyst's surfaces, indicating that P have successfully doped into the carbon matrices. For the large nanoparticles showed in STEM image (**Fig. S4a**), Fe-K (**Fig. S4b**) and C-K (**Fig. S4c**) curves all exhibit strong signals, demonstrating that the large nanoparticles are mainly existed in the form of  $\text{Fe}_3\text{C}$ . Furthermore, in the corresponding area, P-K curve (**Fig. S4d**) also exhibit P signals, which directly prove that the large  $\text{Fe}_3\text{C}$  nanoparticle is surrounded by P doped carbon layers. Especially, in addition to the P atoms dispersed along C, several bright spots with diameters less than 5 nm can also be observed in P-K curve (**Fig. S4d**); which demonstrates the existence of tiny FeP crystals.

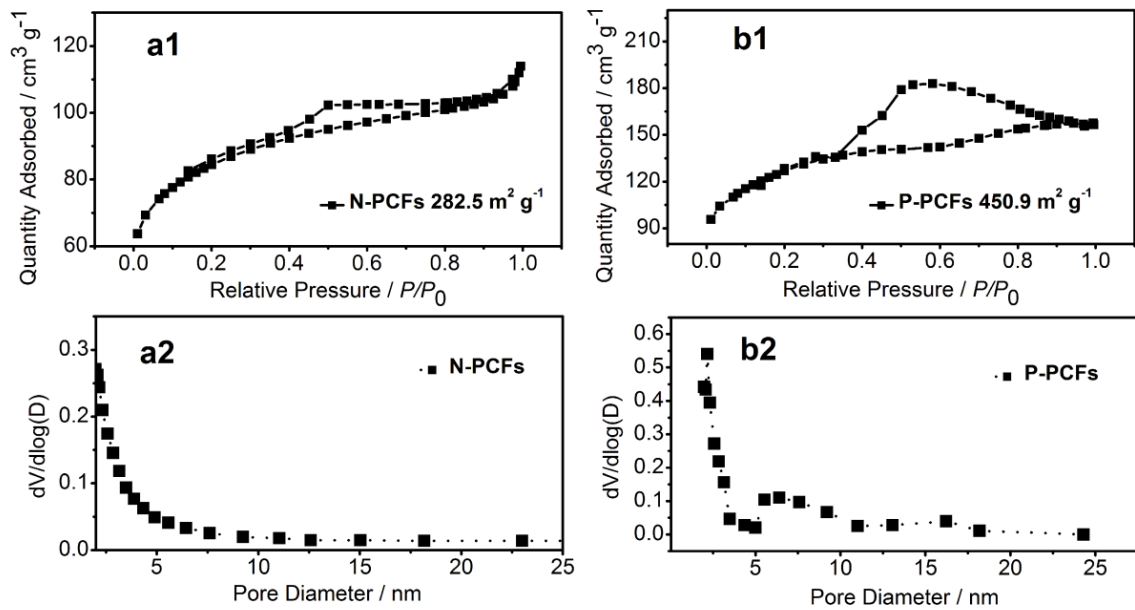

**Fig. S5.** The N<sub>2</sub> adsorption-desorption isotherms (**a1, b1**) and pore size distribution plots (**a2, b2**) of resultant N-PCFs (**a1, a2**) and P-PCFs (**b1, b2**) samples.

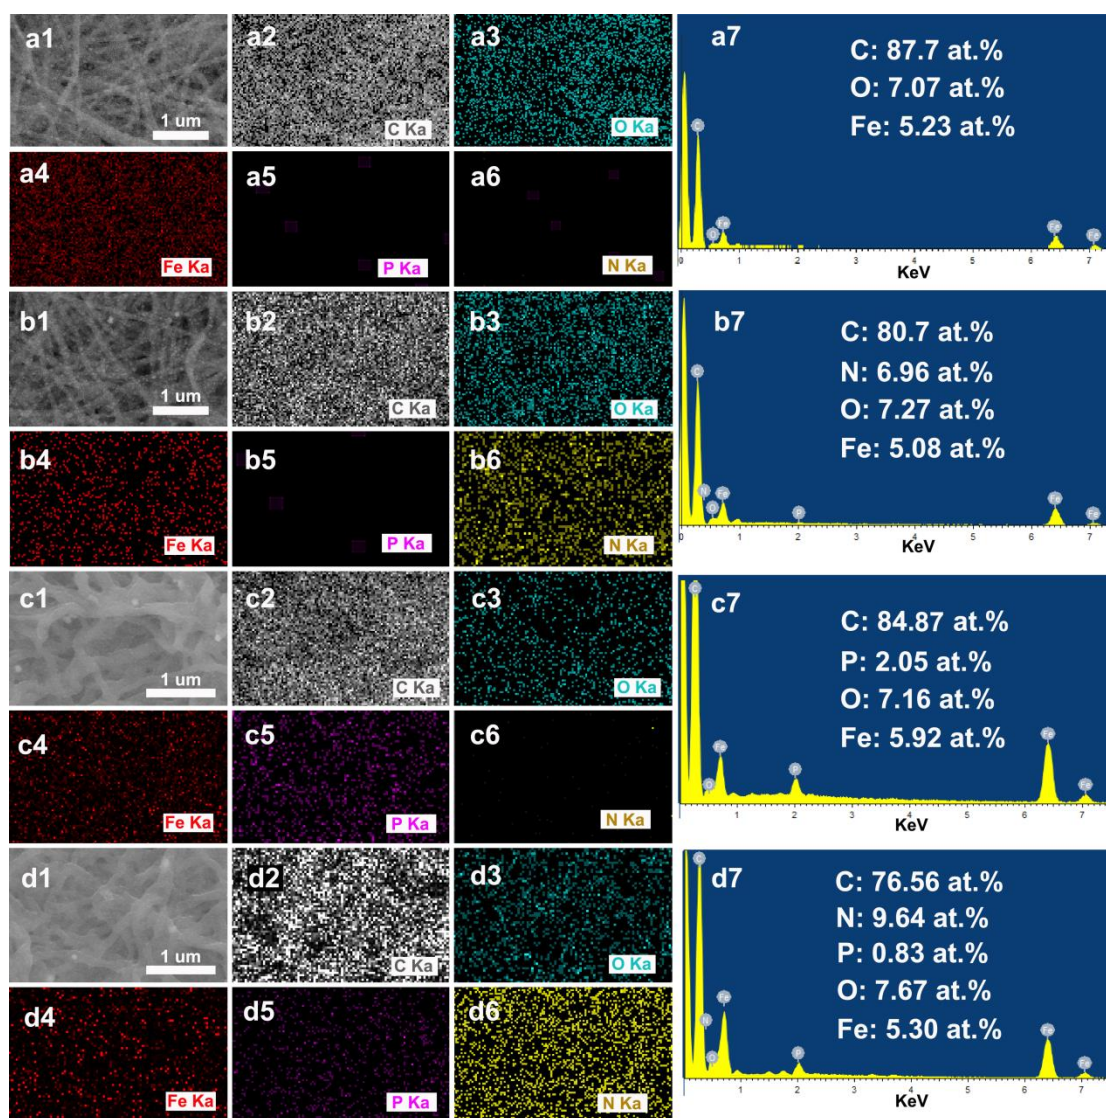

**Fig. S6.** SEM images (a1, b1, c1, d1), the corresponding C (a2, b2, c2, d2), O (a3, b3, c3, d3), Fe (a4, b4, c4, d4), P (a5, b5, c5, d5), N (a6, b6, c6, d6) element mapping images and EDX spectra (a7, b7, c7, d7) of resultant Fe<sub>3</sub>C@PCFs (a1-a7), Fe<sub>3</sub>C@N-PCFs (b1-b7), Fe<sub>3</sub>C@P-PCFs (c1-c7) and Fe<sub>3</sub>C@PN-PCFs (d1-d7) samples.

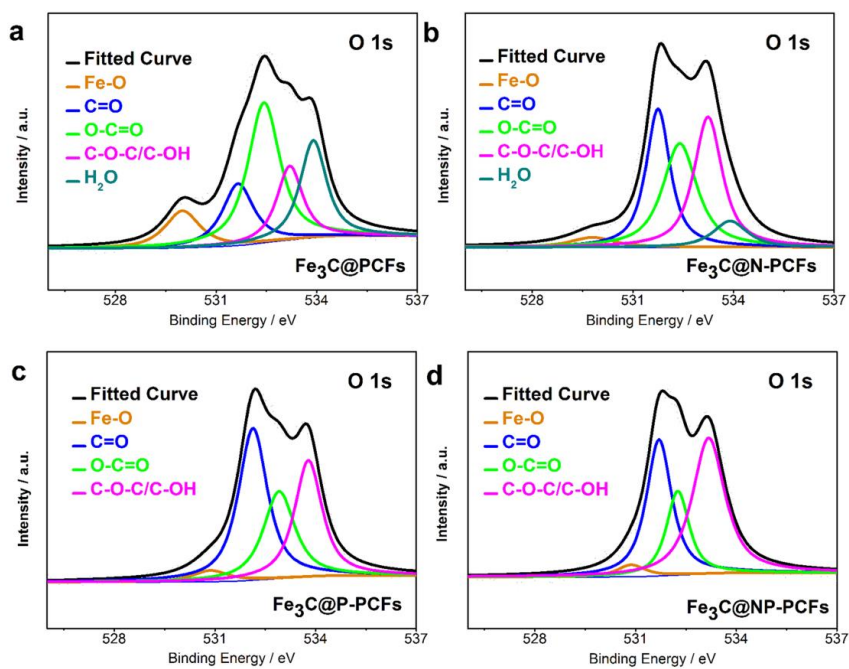

**Fig. S7.** The high-resolution O 1s spectra of resultant Fe<sub>3</sub>C@PCFs (a), Fe<sub>3</sub>C@N-PCFs (b), Fe<sub>3</sub>C@P-PCFs (c) and Fe<sub>3</sub>C@PN-PCFs (d) samples.



**Table S1** The comparison of ORR catalytic parameters in 0.1 M KOH solution between our catalysts and other reported samples.

| Samples                                      | $\Delta E_{\text{onset}}^{\text{a}}$<br>(mV) | $\Delta E_{1/2}^{\text{b}}$<br>(mV) | References                                    |
|----------------------------------------------|----------------------------------------------|-------------------------------------|-----------------------------------------------|
| Fe <sub>3</sub> C@NP-PCFs                    | -15.6                                        | +8.5                                | This work                                     |
| Fe/P/C                                       | -13                                          | +6                                  | Nano Energy 33 (2017) 221–228                 |
| Fe–N–C–800                                   | ~-50                                         | ~-45                                | J. Mater. Chem. A, 2018,6, 2527-2539          |
| Fe–P-900                                     | -20                                          | -25                                 | J. Am. Chem. Soc. 2015, 137, 3165–3168        |
| Fe–N/C-800                                   | -33                                          | -9                                  | J. Am. Chem. Soc. 136 (2014) 11027            |
| Fe-N-CNFs                                    | -30                                          | -20                                 | Angew. Chem. Int. Ed. 54 (2015) 8179 –8183    |
| C-FeTA@g-C <sub>3</sub> N <sub>4</sub>       | -                                            | +40.0                               | J. Power Sources, 417 (2019) 117-124          |
| NPMCS                                        | -30                                          | -19                                 | J. Solid State Electrochem. 21 (2017) 103–110 |
| NH <sub>3</sub> -Fe <sub>0.25</sub> -N/C-900 | ~-40                                         | ~-30                                | Nano Energy 36 (2017) 286–294                 |
| Fe <sub>3</sub> C@B <sub>1.0</sub> NPCFs     | +14                                          | +19                                 | J. Colloid Interf. Sci. 533 (2019) 709-722    |
| Co-C@NWCs                                    | ~-10                                         | +20                                 | Small 12 (2016) 2839–2845                     |
| Co@Co <sub>3</sub> O <sub>4</sub> /NC-1      | ~-180                                        | -10                                 | Angew. Chem. Int. Ed. 55 (2016) 4087 –4091    |
| Co, N-CNF                                    | -7                                           | +20                                 | Adv. Mater. 28 (2016) 1668–1674               |
| HLCT-1/2                                     | +10                                          | +57                                 | Adv. Funct. Mater. 2019, 1900015              |
| Fe-Cu-N/C                                    | +25                                          | +50                                 | Nano Energy 37 (2017) 187–194                 |
| Co <sub>1-x</sub> S/N-S-G                    | +16                                          | +30                                 | J. Mater. Chem. A 5 (2017) 12354-12360        |
| PAC-5S                                       | -90                                          | -60                                 | J. Mater. Chem. A, 5 (2017) 1742-1748         |
| AC-F-U-P                                     | -70                                          | -100                                | Appl. Catal. B-Environ. 204 (2017) 394–402    |

As the commercial Pt/C is the state-of-the-art ORR catalyst and have been chosen as the reference in all previous papers. For fairly comparing the catalytic parameters of different catalysts reported in different papers and simultaneously avoiding the errors caused by different instruments or different researchers' operations:

<sup>a</sup>  $\Delta E_{\text{onset}}$  ( $\Delta E_{\text{onset}} = E_{\text{onset}}$  for resultant catalyst -  $E_{\text{onset}}$  for Pt/C);

<sup>b</sup>  $\Delta E_{1/2}$  ( $\Delta E_{1/2} = E_{1/2}$  for resultant catalyst -  $E_{1/2}$  for Pt/C).

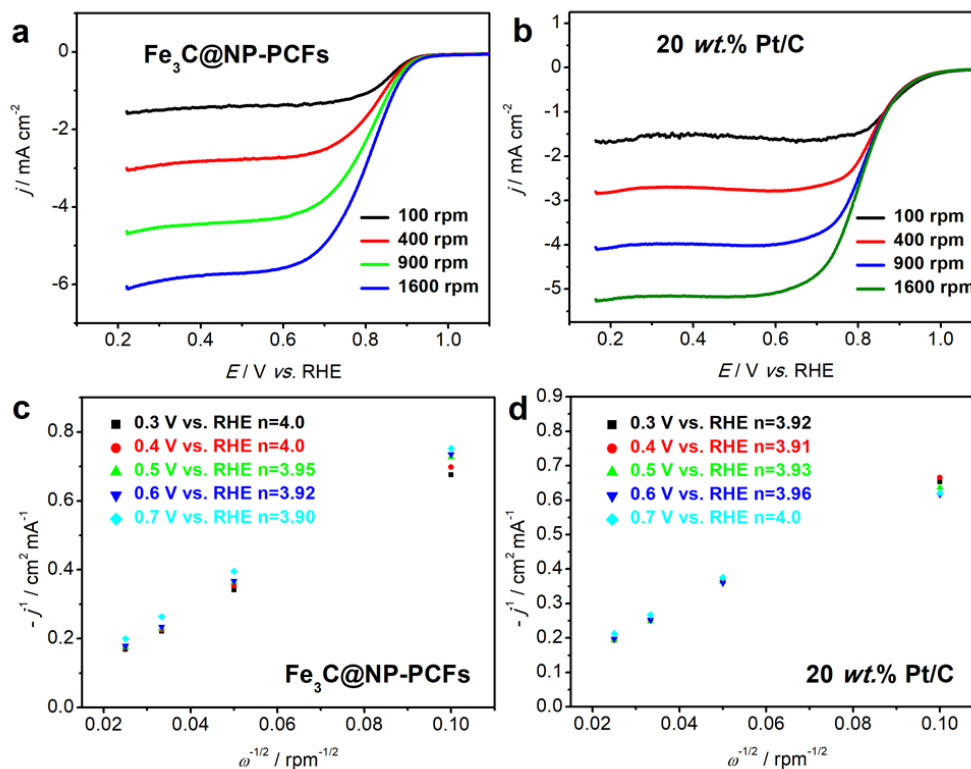

**Fig. S8.** LSV polarization curves of  $\text{Fe}_3\text{C@NP-PCFs}$  (a) and 20 wt.% Pt/C (b) catalysts measured in  $\text{O}_2$ -saturated 0.1 M KOH at various rotation speeds from 100 rpm to 1600 rpm at scan rate of  $5 \text{ mV s}^{-1}$ . The corresponding  $K$ - $L$  plots of  $\text{Fe}_3\text{C@NP-PCFs}$  (c) and 20 wt.% Pt/C (d) catalysts. LSVs were obtained by scanning the potential from 1.10 to 0.20 V vs. RHE at various rotation speeds.

The corresponding Koutecky–Levich ( $K$ - $L$ ) plots ( $j^{-1}$  vs.  $\omega^{-1/2}$ ) derived from the RDE voltammograms (Fig. S8a, 8b) according to the equations expressed as eqn. S1 and eqn. S2 are presented in Fig. S8c, 8d. The  $K$ - $L$  plots are usually used to assess the apparent electron transfer numbers ( $n$ ) during the ORR:

$$\frac{1}{j} = \frac{1}{j_k} + \frac{1}{j_L} \quad (\text{S1})$$

$$j_L = 0.62nFAD^{2/3}\nu^{-1/6}\omega^{1/2}C_{\text{O}_2} \quad (\text{S2})$$

Herein,  $j$ ,  $j_k$  and  $j_L$  are the measured, kinetic, and diffusion limiting current densities ( $\text{mA cm}^{-2}$ ), respectively. The  $n$  value is the number of electrons transferred during the ORR and is extracted from the slope,  $F$  is the Faraday's constant ( $96485 \text{ C mol}^{-1}$ ).  $D$  is the diffusion coefficient for oxygen ( $1.9 \times 10^{-5} \text{ cm}^2 \text{ s}^{-1}$ ),  $\nu$  is the kinetic

viscosity ( $1.13 \times 10^{-2} \text{ cm}^2 \text{ s}^{-1}$ ),  $\omega$  is the rotation rate of electrode (rpm),  $C_{\text{O}_2}$  is the bulk concentration of oxygen dissolved in the electrolyte ( $1.2 \times 10^{-3} \text{ mol m}^{-3}$ ).

The  $K$ – $L$  plots at various potentials exhibit good linearity and parallelism for the  $\text{Fe}_3\text{C@NP-PCFs}$  and 20 wt.% Pt/C catalysts in 0.1 M KOH (**Fig. S8a, 8b**), indicating the first-order reaction kinetics for ORR with respect to the concentration of dissolved oxygen in 0.1 M KOH. The  $n$  values for the two catalysts at different potentials were calculated and recorded in **Fig. S8c, 8d**. It is clear that the  $n$  values calculated between 0.3–0.7 V vs. RHE are between 3.90–4.00 for  $\text{Fe}_3\text{C@NP-PCFs}$  and 20 wt.% Pt/C catalysts in 0.1 M KOH, respectively, which demonstrates a dominant 4 e<sup>−</sup> transfer pathway for the  $\text{Fe}_3\text{C@NP-PCFs}$  catalyst in 0.1 M KOH, similar to ORR catalyzed by the state-of-the-art Pt/C catalyst.

**Table S2** The comparison of catalytic parameters in 0.5 M H<sub>2</sub>SO<sub>4</sub> solution between our catalysts and other reported samples.

|                                          | $\Delta E_{\text{onset}}^{\text{a}}$<br>(mV) | $\Delta E_{1/2}^{\text{b}}$<br>(mV) | References                                                   |
|------------------------------------------|----------------------------------------------|-------------------------------------|--------------------------------------------------------------|
| Fe <sub>3</sub> C@NP-PCFs                | -10.1                                        | -27.7                               | This work                                                    |
| Fe <sub>3</sub> C@B <sub>1.0</sub> NPCFs | -40                                          | -50                                 | Journal of colloid and interface science, 2019, 533, 709-722 |
| TM-N-C                                   | -70                                          | -90                                 | Small, 2014,10, 4072-4079                                    |
| Fe/P/C networks                          | -56                                          | -70                                 | Nano Energy, 2017, 33, 221–228                               |
| Fe–N–C/VA-CNT                            | ~ -50                                        | ~ -50                               | Adv. Funct. Mater. 2016, 26, 738                             |
| Fe <sub>3</sub> C@NCNF-900               | -153                                         | -149                                | ACS Appl. Mater. Interfaces 2016, 8, 4118–4125               |
| Fe–P-900                                 | ~ -180                                       | ~ -300                              | J. Am. Chem. Soc. 2015, 137, 3165                            |
| LDH@ZIF-67-800                           | ~ -50                                        | -                                   | Adv. Mater. 2016, 28, 2337–2344                              |
| pPMF-800                                 | -84                                          | -72                                 | Nanoscale, 2016, 8, 959–964                                  |
| Fe-N-CNFs                                | ~ -100                                       | ~ -150                              | Angew. Chem. Int. Ed. 2015, 54, 8179 –8183                   |
| Fe <sub>3</sub> C/NCNTs/<br>OBP-900      | ~ -100                                       | ~ -100                              | J. Mater. Chem. A, 2015, 3, 21451–21459                      |
| Fe <sub>3</sub> C/NG-800                 | ~ -100                                       | ~ -100                              | Adv. Mater. 2015, 27, 2521–2527                              |
| Fe–N/C-800                               | -38                                          | -59                                 | J. Am. Chem. Soc. 2014, 136, 11027–11033                     |
| PMF-800                                  | -44                                          | ~ -180                              | J. Am. Chem. Soc. 2015, 137, 1436–1439                       |

As the commercial Pt/C is the state-of-the-art ORR catalyst and have been chosen as the reference in all previous papers. For fairly comparing the catalytic parameters of different catalysts reported in different papers and simultaneously avoiding the errors caused by different instruments or different researchers' operations:

<sup>a</sup>  $\Delta E_{\text{onset}}$  ( $\Delta E_{\text{onset}} = E_{\text{onset}}$  for resultant catalyst -  $E_{\text{onset}}$  for Pt/C);

<sup>b</sup>  $\Delta E_{1/2}$  ( $\Delta E_{1/2} = E_{1/2}$  for resultant catalyst -  $E_{1/2}$  for Pt/C).

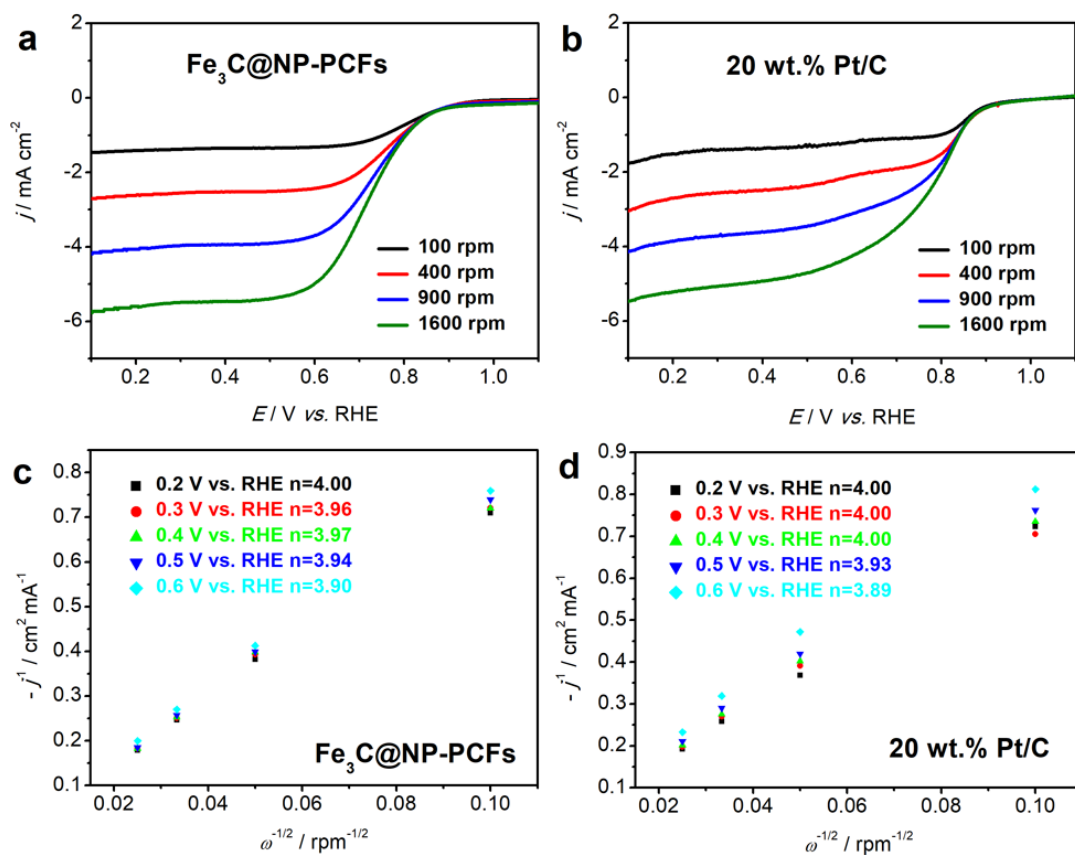

**Fig. S9.** LSV polarization curves of  $\text{Fe}_3\text{C@NP-PCFs}$  (a) and 20 wt.% Pt/C (b) catalysts measured in  $\text{O}_2$ -saturated 0.5 M  $\text{H}_2\text{SO}_4$  at various rotation speeds from 100 rpm to 1600 rpm at scan rate of  $5 \text{ mV s}^{-1}$ . The corresponding  $K$ - $L$  plots of  $\text{Fe}_3\text{C@NP-PCFs}$  (c) and 20 wt.% Pt/C (d) catalysts. LSVs were obtained by scanning the potential from 1.10 to 0.10 V vs. RHE at various rotation speeds.

The corresponding  $K$ - $L$  plots ( $j^{-1}$  vs.  $\omega^{-1/2}$ ) derived from the RDE voltammograms in 0.5 M  $\text{H}_2\text{SO}_4$  (Fig. S9a, 9b) according to the equation expressed as eqn. S1 and eqn. S2 are presented in Fig. S9c, 9d. The  $K$ - $L$  plots at various potentials also exhibit good linearity and parallelism for the  $\text{Fe}_3\text{C@NP-PCFs}$  and 20 wt.% Pt/C catalysts in 0.5 M  $\text{H}_2\text{SO}_4$ , indicating the first-order reaction kinetics for ORR with respect to the concentration of dissolved oxygen in 0.5 M  $\text{H}_2\text{SO}_4$ . The  $n$  values of two catalysts at different potentials were calculated and recorded in Fig. S9c, 9d. It is clear that the  $n$  values calculated between 0.2-0.6 V vs. RHE are between 3.90-4.00 for  $\text{Fe}_3\text{C@NP-PCFs}$  and 20 wt.% Pt/C catalysts in 0.5 M  $\text{H}_2\text{SO}_4$ , respectively; which demonstrates a dominant  $4 e^-$  transfer pathway for the  $\text{Fe}_3\text{C@NP-PCFs}$  catalyst in 0.5 M  $\text{H}_2\text{SO}_4$ , similar to ORR catalyzed by the state-of-the-art Pt/C catalyst.

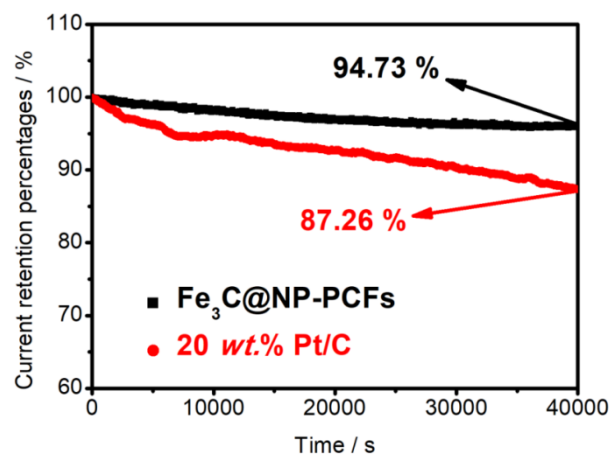

**Fig. S10.** The chronoamperometric responses of Fe<sub>3</sub>C@NP-PCFs and 20 wt.% Pt/C catalysts in O<sub>2</sub>-saturated 0.5 M H<sub>2</sub>SO<sub>4</sub> solution recorded at 0.65 V vs. RHE with a rotation rate of 900 rpm.

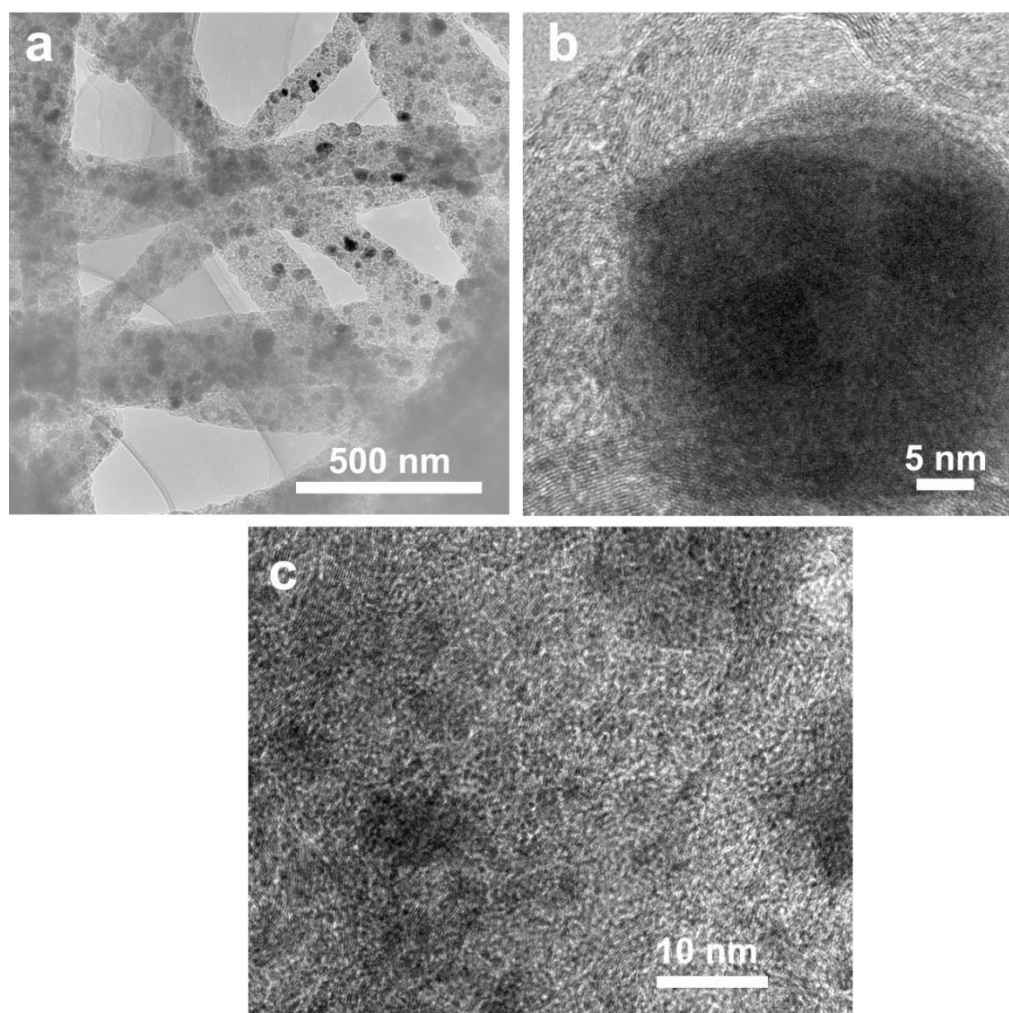

**Fig. S11.** LSV polarization curves of Fe<sub>3</sub>C@NP-PCFs (a) and 20 wt.% Pt/C (b) catalysts measured in O<sub>2</sub>-saturated 0.5 M H<sub>2</sub>SO<sub>4</sub> at various rotation speeds from 100 rpm to 1600 rpm at scan rate of 5 mV s<sup>-1</sup>. The corresponding *K-L* plots of Fe<sub>3</sub>C@NP-PCFs (c) and 20 wt.% Pt/C (d) catalysts. LSVs were obtained by scanning the potential from 1.10 to 0.10 V vs. RHE at various rotation speeds.

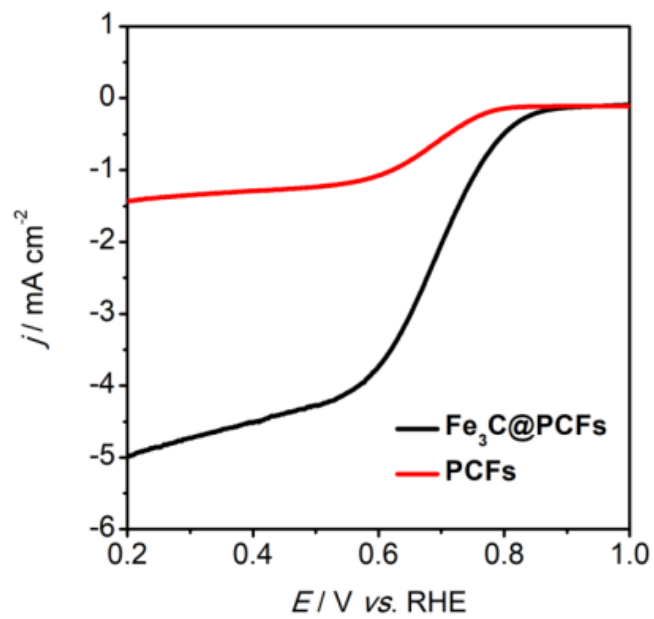

**Fig. S12.** The ORR LSV polarization curves of PCFs and Fe<sub>3</sub>C@PCFs control samples in 0.1 M KOH.
